# Supplementary material for: Telepresence-teleguidance to facilitate training and quality assurance in ERCP: a health economic modeling approach
Source: PubMed Central journal article supplement — Endosc Int Open. 2020 Feb 21;8(3):E326–37. doi: 10.1055/a-1068-9153 (PMC7035055; doi:10.1055/a-1068-9153), 2020-02-21
Supplement: 1601supmat-10-1055-a-1068-9153.pdf [file 1601supmat-10-1055-a-1068-9153.pdf]

## Appendix

### Formula 1-3

TM% represents the difference in knowledge between the expert and the endoscopist under training (*NOVICE*).  $P_{Expert}$  is the outcome of the procedure performed by the expert endoscopist, and  $P_{Novice}$  the predicted outcome in case the novice-trainee endoscopist completed the entire procedure. The outcome for the novice-trainee endoscopist under teleguidance  $P_{TM}$ , is in the model calculated by use of the equation as specified below.

#### Formula 1:

$$P_{TM} = P_{Novice} + TM\% \cdot (P_{Expert} - P_{Novice})$$

### Formula 2

The data from the dedicated literature review [8-34], were used to construct logistic regression model for the risk of post ERCP pancreatitis, bleeding, perforation, infection and death to be integrated in the health economic model. All outcomes were dependent on the four parameters; number of procedures performed by the endoscopist per year, the average age of the patients undergoing the ERCP procedures performed by the individual, % of females among those undergoing the procedures and finally the average difficulty rank of the ERCP procedures performed. For further details see Formula 2.

A four variable logistic regression models, given by Formula 2, for calculating the probability of having post ERCP complications such as pancreatitis, bleeding, perforation, infection or even a lethal outcome.

#### Formula 2:

$$\ln\left(\frac{P}{1-P}\right) = f(x_1, x_2, x_3, x_4) = a_0 + a_1(x_1 - \bar{x}_1) + a_2(x_2 - \bar{x}_2) + a_3(x_3 - \bar{x}_3) + a_4(x_4 - \bar{x}_4)$$
$$P = \frac{\exp(f)}{1 + \exp(f)}$$

The centers correspond to the parameter values  $(\bar{x}_1, \bar{x}_2, \bar{x}_3, \bar{x}_4)$  from Formula 2 as detailed above. Inserting  $(x_1, x_2, x_3, x_4) = (\bar{x}_1, \bar{x}_2, \bar{x}_3, \bar{x}_4)$  into this equation, each outcome variable equals to the mean probabilities captured from the systematic literature review [8]. The centers  $(\bar{x}_1, \bar{x}_2, \bar{x}_3, \bar{x}_4)$  were calculated by numerically solving the equation  $p(x_1, x_2, x_3, x_4) - p_{average} = 0$ .

### Formula 3

$t_{TM}$  is the time required for a novice-trainee to reach a cannulation rate close to that of an expert, if he or she has access to teleguidance. The corresponding time to attain a cannulation rate close to that of an expert without such a training option is represented by  $t_{traditional}$ .  $t$  is the time the novice-trainee will use the teleguided assistance offered by the expert.

### Formula 3

$$A = \begin{cases} \frac{t_{conventional} - t_{TM}}{2} \cdot y & \text{if } t \geq t_{TM} \\ \frac{t \cdot \sin \alpha \cdot \left( \sqrt{t_{conventional}^2 + y^2} + (t_{TM} - t) \cdot \frac{\sin \alpha + \sin \beta}{\sin \delta \cdot \sin \beta} \right)}{2 \cdot \sin \delta} & \text{if } t < t_{TM} \end{cases}$$

In this equation  $\alpha$ ,  $\beta$  and  $\delta$  can be determined using algebra. When the training sessions are terminated at  $t$  before  $t_{TM}$  is reached, it was assumed that the novice-trainee will return to the traditional learning curve. This assumption will, however, most likely introduce an under-estimation of the effect. Alternatively, the cost-saving could converge into a situation between the teleguidance learning curve and the traditional learning curve and the theoretical cost savings accordingly between  $A(t < t_{TM})$  and  $A(t \geq t_{TM})$ . In addition, the time span covered by the model is one year, why only  $A / (t_{traditional} \cdot n_{novice})$  was taken into account. In the model  $n_{novice}$  represents the number of ERCPs/year performed by the novice-trainee. Currently it was assumed that the novice-trainee will use, and has access to, the teleguidance equipment during three years. Since the depreciation time of the equipment traditionally is 3-5 years,  $t$  is set to 3 years. For the novice trainee with an initial cannulation rate of 85%, performing on an average 50 ERCP/year,  $t_{TM}$  will be 5 years, and  $t_{traditional}$  10 years.

Figure s1: Markov model defining the outcomes after hospital admission

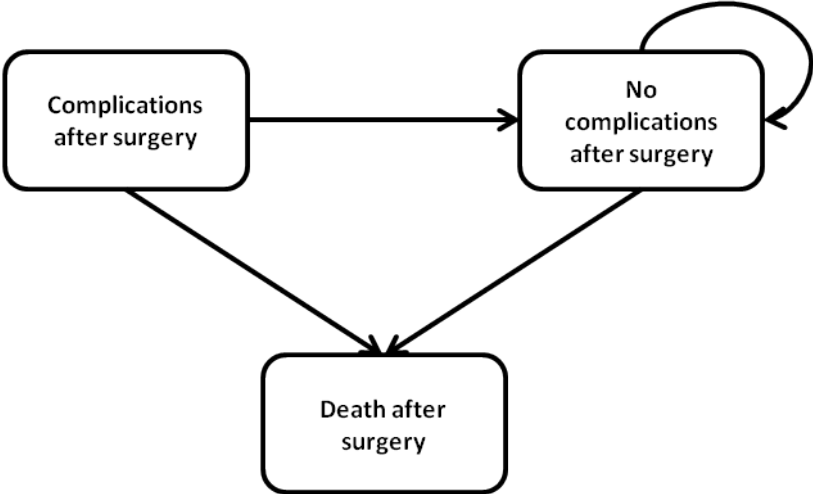

## Supplemental tables

**Table s1** Probabilities, Number of professionals and length of stay.

| Variable                                            | Value  | SD     | Source | Distribution |
|-----------------------------------------------------|--------|--------|--------|--------------|
| Probability of pancreatitis                         | 3.47%  | 0.14%  | [1]    | Beta         |
| Probability of bleeding                             | 1.34%  | 0.08%  | [1]    | Beta         |
| Probability of perforation                          | 0.60%  | 0.05%  | [1]    | Beta         |
| Probability of infection                            | 1.44%  | 0.09%  | [1]    | Beta         |
| Probability of cardiopulmonary complications        | 1.33%  | 0.10%  | [1]    | Beta         |
| Probability of ERCP death                           | 0.33%  | 0.04%  | [1]    | Beta         |
| Probability of PTC complications                    | 5%     | 3.33%  | [13]   | Beta         |
| Probability of PTC death                            | 0.32%  | 0.04%  | KOL    | Beta         |
| Probability of open surgery complications           | 10%    | 3%     | [13]   | Beta         |
| Probability of open surgery death                   | 0.32%  | 0.04%  | KOL    | Beta         |
| Probability of cannulation failure ERCP (expert)    | 5%     | 0.2%   | KOL    | Beta         |
| Probability of cannulation failure re-ERCP (expert) | 10%    | 0.2%   | [13]   | Beta         |
| Probability of cannulation failure ERCP (novice)    | 20%    | 0.2%   | KOL    | Beta         |
| Probability of cannulation failure re-ERCP (novice) | 20%    | 0.2%   | KOL    | Beta         |
| Probability of cannulation failure PTC              | 3%     | 1.67%  | [13]   | Beta         |
| Annual mortality rate in markov f(age.gender)       |        | -      | [14]   | Constant     |
| Procedure length ERCP (hours)                       | 0.9480 | 0.5173 | KSdata | lognormal    |
| Procedure length ERCP factor                        | 1.5    | -      | KOL    | Constant     |
| Procedure length PTC (hours)                        | 0.9480 | 0.5173 | KOL    | lognormal    |
| Procedure length open surgery (hours)               | 2.5    | 1      | KOL    | lognormal    |
| Number of nurses ERCP                               | 3      | -      | KOL    | Constant     |
| Number of nurses PTC                                | 3      | -      | KOL    | Constant     |
| Number of nurses open surgery                       | 3      | -      | KOL    | Constant     |
| Number of doctors ERCP                              | 1      | -      | KOL    | Constant     |
| Number of doctors PTC                               | 1      | -      | KOL    | Constant     |
| Number of doctors open surgery                      | 1      | -      | KOL    | Constant     |
| LOS ERCP (days)                                     | 1      | 0.5    | [15]   | Lognormal    |
| LOS PTC (days)                                      | 2      | 1      | KOL    | Lognormal    |
| LOS Open surgery (days)                             | 5      | 2      | [15]   | Lognormal    |
| Additional LOS pancreatitis (days)                  | 4      | 2      | [15]   | Lognormal    |
| Additional LOS bleeding (days)                      | 4      | 2      | [15]   | Lognormal    |
| Additional LOS perforation (days)                   | 4      | 2      | [15]   | Lognormal    |
| Additional LOS infection (days)                     | 4      | 2      | [15]   | Lognormal    |
| Additional LOS cardiopulmonary complications (days) | 4      | 2      | [15]   | Lognormal    |
| Additional LOS PTC                                  | 4      | 2      | KOL    | Lognormal    |

|                                                         |   |     |      |           |
|---------------------------------------------------------|---|-----|------|-----------|
| <b>complications (days)</b>                             |   |     |      |           |
| <b>Additional LOS Open surgery complications (days)</b> | 3 | 2   | [15] | Lognormal |
| <b>Additional LOS previous resurgery (days)</b>         | 2 | 0.5 | KOL  | Lognormal |

SD, standard deviation; ERCP, endoscopic retrograde cholangiopancreatography; PTC, percutaneous-transhepatic-cholangiography; LOS, length of stay

**Table s2** Costs and utility estimates.

| <b>Variable</b>                                        | <b>Value</b> | <b>SD</b> | <b>Source</b> | <b>Distribution</b> |
|--------------------------------------------------------|--------------|-----------|---------------|---------------------|
| <b>Expert guidance cost (SEK)</b>                      | 1835         | -         | KSdata        | Constant            |
| <b>Additional guidance cost (SEK)</b>                  | 1200         | -         | KSdata        | Constant            |
| <b>Cost of initial training (SEK)</b>                  | 300000       | -         | KOL           | Constant            |
| <b>Transport to KS from center B (SEK)</b>             | 34000        | 3400      | KSdata        | Lognormal           |
| <b>Tm equipment center B (SEK)</b>                     | 200000       | -         | KSdata        | Constant            |
| <b>Ward/day (SEK)</b>                                  | 6000         | 600       | KOL           | Lognormal           |
| <b>Hospital death (SEK)</b>                            | 5000         | 500       | KOL           | Lognormal           |
| <b>Surgery room/h (SEK)</b>                            | 1904         | -         | KSdata        | Constant            |
| <b>Nurse salary/h (SEK)</b>                            | 218          | 21        | KSdata        | Lognormal           |
| <b>Doctor salary/h (SEK)</b>                           | 568          | 56        | KSdata        | Lognormal           |
| <b>ERCP cost (SEK)</b>                                 | 3066         | -         | KSdata        | Constant            |
| <b>ERCP supplies (SEK)</b>                             | 7760         | 776       | KSdata        | Lognormal           |
| <b>ERCP Procedure medications (SEK)</b>                | 64           | 6         | [16]          | Lognormal           |
| <b>ERCP medications/day (SEK)</b>                      | 50           | 5         | ASM           | Lognormal           |
| <b>PTC supplies (SEK)</b>                              | 4438         | 443       | [13]          | Lognormal           |
| <b>PTC Procedure medications (SEK)</b>                 | 50           | 5         | ASM           | Lognormal           |
| <b>PTC medications/day (SEK)</b>                       | 50           | 5         | ASM           | Lognormal           |
| <b>Open surgery surgical supplies (SEK)</b>            | 103084       | 10308     | [13]          | Lognormal           |
| <b>Open surgery Procedure medications (SEK)</b>        | 50           | 5         | ASM           | Lognormal           |
| <b>Open surgery medications/day (SEK)</b>              | 50           | 5         | ASM           | Lognormal           |
| <b>Treatment cost ERCP complications (SEK)</b>         | 55312        | 5531      | [13]          | Lognormal           |
| <b>Treatment cost PTC complications (SEK)</b>          | 55312        | 5531      | [13]          | Lognormal           |
| <b>Treatment cost Open surgery complications (SEK)</b> | 231021       | 23102     | [13]          | Lognormal           |
| <b>USD to SEK convection (2016-02)</b>                 | 8.2388       | -         | [17]          | Constant            |
| <b>EUR to SEK convection (2016-02)</b>                 | 9.4114       | -         | [17]          | Constant            |
| <b>Annual cost inflation</b>                           | 2.6%         | -         | KSdata        | Constant            |
| <b>Utility of complications after ERCP</b>             | 0.884        | 0.038     | [18]          | Beta                |
| <b>Utility of no complications after ERCP</b>          | 0.9904       | 0.038     | [18]          | Beta                |
| <b>Age utility decrement</b>                           | -            | -         | [19]          | Normal              |
|                                                        | 0.0003       | 0.0002    |               |                     |

SD, standard deviation; ERCP, endoscopic retrograde cholangiopancreatography

**Table s3** Scenario parameters – base case.

| <b>Variable</b>                      | <b>Value</b>   | <b>SD</b> | <b>Source</b> | <b>Distribution</b> |
|--------------------------------------|----------------|-----------|---------------|---------------------|
| <b>Cohort age</b>                    | 62             | 5         | [1]           | Lognormal           |
| <b>%females in cohort</b>            | 58%            | -         | [1]           | Constant            |
| <b>Number of ERCP/year expert</b>    | 250            | 25        | KOL           | Lognormal           |
| <b>Number of ERCP/year novice</b>    | 50             | 5         | ASM           | Lognormal           |
| <b>%expert knowledge transferred</b> | 50%            | 5%        | ASM           | Beta                |
| <b>Resurgery nr 1</b>                | ERCP           | -         | ASM           | Constant            |
| <b>Resurgery nr 2</b>                | PTC            | -         | ASM           | Constant            |
| <b>Resurgery nr 3</b>                | send to expert | -         | ASM           | Constant            |
| <b>Difficulty (1-4)</b>              | 1.98           | 0.87      | ASM           | Gen. beta           |

SD, standard deviation; ERCP, endoscopic retrograde cholangiopancreatography

**Table s4** Base case results.

|                                       | <b>Mean</b> | <b>95% CI</b> |              |
|---------------------------------------|-------------|---------------|--------------|
|                                       |             | <b>Lower</b>  | <b>Upper</b> |
| <b>Incremental costs</b>              | -369        | -406          | -331         |
| <b>Incremental QALYs</b>              | 0.0005      | 0.00048       | 0.00053      |
| <b>INB (500k SEK per QALY)</b>        | 636         | 595           | 674          |
| <b>Probability cost effectiveness</b> | 84.2%       |               |              |
| <b>Probability cost saving</b>        | 72.7%       |               |              |
| <b>Probability QALY increase</b>      | 91.5%       |               |              |

QALY, quality-adjusted life year



**Table s5** Key results for centers with endoscopists performing 50 ERCP per year and common resurgery strategy: ERCP-PTC-send to expert.

| <b>Expert %</b>                       | <b>25% 2</b>                                | <b>25% 3</b>                                | <b>25% 4</b>                                | <b>50% 2</b>                                | <b>50% 3</b>                                | <b>50% 4</b>                                | <b>75% 2</b>                    | <b>75% 3</b>                                | <b>75% 4</b>                                |
|---------------------------------------|---------------------------------------------|---------------------------------------------|---------------------------------------------|---------------------------------------------|---------------------------------------------|---------------------------------------------|---------------------------------|---------------------------------------------|---------------------------------------------|
| <b>Difficult y</b>                    | <b>(95% CI)</b>                             | <b>(95% CI)</b>                 | <b>(95% CI)</b>                             | <b>(95% CI)</b>                             |
| <b>Incremental costs (SEK)</b>        | 1337<br>(1306<br>1382)                      | 773<br>(738.<br>817)                        | 99<br>(54.<br>151)                          | -359<br>(-<br>395.<br>-320)                 | -1542<br>(-<br>1588.<br>-<br>1496)          | -3045<br>(-<br>3100.<br>-<br>2994)          | -1777<br>(-1821.<br>-1729)      | -3494<br>(-<br>3552.<br>-<br>3446)          | -5726<br>(-<br>5804.<br>-<br>5658)          |
| <b>Incremental QALYs</b>              | 0.000<br>3<br>(0.00<br>027.<br>0.000<br>33) | 0.000<br>3<br>(0.00<br>027.<br>0.000<br>33) | 0.000<br>4<br>(0.00<br>036.<br>0.000<br>45) | 0.000<br>5<br>(0.00<br>048.<br>0.000<br>53) | 0.000<br>7<br>(0.00<br>066.<br>0.000<br>73) | 0.000<br>8<br>(0.00<br>076.<br>0.000<br>84) | 0.0008<br>(0.00078.<br>0.00083) | 0.001<br>1<br>(0.00<br>106.<br>0.001<br>14) | 0.001<br>3<br>(0.00<br>126.<br>0.001<br>34) |
| <b>INB (500k SEK per QALY)</b>        | -1205<br>(-<br>1252.<br>-<br>1252)          | -608<br>(-<br>654.<br>-570)                 | 100<br>45.<br>152)                          | 633<br>(590.<br>672)                        | 1894<br>(1842<br>1945)                      | 3456<br>(3398<br>3518)                      | 2183<br>(2133.<br>2230)         | 4028<br>(3974<br>4088)                      | 6381<br>(6310<br>6463)                      |
| <b>Probability cost effectiveness</b> | 2.0%                                        | 19.6<br>%                                   | 55.5<br>%                                   | 81.3<br>%                                   | 99.0<br>%                                   | 100%                                        | 99.4%                           | 100%                                        | 100%                                        |
| <b>Probability cost saving</b>        | 0.3%                                        | 10.5<br>%                                   | 45.9<br>%                                   | 70.7<br>%                                   | 98.1<br>%                                   | 100%                                        | 98.7%                           | 100%                                        | 100%                                        |
| <b>Probability QALY increase</b>      | 71.6<br>%                                   | 70.7<br>%                                   | 68.4<br>%                                   | 91.0<br>%                                   | 89.7<br>%                                   | 87.2<br>%                                   | 98.2%                           | 97.1<br>%                                   | 97.2<br>%                                   |

ERCP, endoscopic retrograde cholangiopancreatography; PTC, percutaneous-transhepatic-cholangiography; QALY, quality-adjusted life year

**Table s6** Key results for centers with endoscopists performing 100 ERCP per year and common resurgery strategy: ERCP-PTC-Open surgery.

| <b>Expert %<br/>Difficulty</b>        | <b>25%<br/>2<br/>(95%<br/>CI)</b>           | <b>25%<br/>3<br/>(95%<br/>CI)</b>           | <b>25%<br/>4<br/>(95%<br/>CI)</b>           | <b>50%<br/>2<br/>(95%<br/>CI)</b>           | <b>50%<br/>3<br/>(95%<br/>CI)</b>           | <b>50%<br/>4<br/>(95%<br/>CI)</b>            | <b>75%<br/>2<br/>(95%<br/>CI)</b>           | <b>75%<br/>3<br/>(95%<br/>CI)</b>           | <b>75%<br/>4<br/>(95%<br/>CI)</b>           |
|---------------------------------------|---------------------------------------------|---------------------------------------------|---------------------------------------------|---------------------------------------------|---------------------------------------------|----------------------------------------------|---------------------------------------------|---------------------------------------------|---------------------------------------------|
| <b>Incremental costs (SEK)</b>        | 1980<br>(1952.<br>2031)                     | 1523<br>(1490.<br>1571)                     | 958<br>(915.<br>1011)                       | 496<br>(461.<br>540)                        | -446<br>(-491.<br>-401)                     | -1718<br>(-1772.<br>1668)                    | -746<br>(-792.<br>-697)                     | -2207<br>(-2261.<br>2150)                   | -4157<br>(-4237.<br>4095)                   |
| <b>Incremental QALYs</b>              | 0.000<br>2<br>(0.000<br>18.<br>0.000<br>22) | 0.000<br>2<br>(0.000<br>17.<br>0.000<br>24) | 0.000<br>3<br>(0.000<br>26.<br>0.000<br>34) | 0.000<br>4<br>(0.000<br>37.<br>0.000<br>43) | 0.000<br>5<br>(0.000<br>47.<br>0.000<br>53) | 0.000<br>6<br>(-0.000<br>56.<br>0.000<br>64) | 0.000<br>6<br>(0.000<br>58.<br>0.000<br>63) | 0.000<br>7<br>(0.000<br>67.<br>0.000<br>73) | 0.000<br>9<br>(0.000<br>86.<br>0.000<br>88) |
| <b>INB (500k SEK per QALY)</b>        | -1881<br>(-1934.<br>-1849)                  | -1416<br>(-1465.<br>-1377)                  | -832<br>(-892.<br>-781)                     | -293<br>(-339.<br>-253)                     | 686<br>(641.<br>735)                        | 2000<br>(1944.<br>2059)                      | 1045<br>(995.<br>1093)                      | 2575<br>(2516.<br>2627)                     | 4622<br>(4555.<br>4706)                     |
| <b>Probability cost effectiveness</b> | 0.0%                                        | 1.4%                                        | 16%                                         | 35.9%                                       | 81.5%                                       | 98.2%                                        | 90.1%                                       | 99.6%                                       | 100%                                        |
| <b>Probability cost saving</b>        | 0.0%                                        | 0.1%                                        | 7.7%                                        | 23.9%                                       | 71.9%                                       | 98.1%                                        | 82.2%                                       | 99.1%                                       | 100%                                        |
| <b>Probability QALY increase</b>      | 68.1%                                       | 64.6%                                       | 63.3%                                       | 84.9%                                       | 81.8%                                       | 79.5%                                        | 93.8%                                       | 92.0%                                       | 91.6%                                       |

ERCP, endoscopic retrograde cholangiopancreatography; PTC, percutaneous-transhepatic-cholangiography; QALY, quality-adjusted life year

**Table s7** Key results for centers with endoscopists performing 50 ERCP per year and common resurgery strategy: PTC-send to expert.

| <b>Expert %</b>                       | <b>25% 2</b>                                | <b>25% 3</b>                                | <b>25% 4</b>                                | <b>50% 2</b>                                | <b>50% 3</b>                                | <b>50% 4</b>                                | <b>75% 2</b>                                | <b>75% 3</b>                                | <b>75% 4</b>                                |
|---------------------------------------|---------------------------------------------|---------------------------------------------|---------------------------------------------|---------------------------------------------|---------------------------------------------|---------------------------------------------|---------------------------------------------|---------------------------------------------|---------------------------------------------|
| <b>Difficult y</b>                    | <b>(95% CI)</b>                             |
| <b>Incremental costs (SEK)</b>        | 1395<br>(1358<br>1454)                      | 1054<br>(1030<br>1108)                      | 677<br>(626.<br>742)                        | -110<br>(-164.<br>-47)                      | -779<br>(-844.<br>-717)                     | -1597<br>(-1677.<br>-1522)                  | -1393<br>(-1468.<br>-1321)                  | -2565<br>(-2659.<br>-2485)                  | -3843<br>(-3966.<br>-3743)                  |
| <b>Incremental QALYs</b>              | 0.000<br>2<br>(0.00<br>018.<br>0.000<br>22) | 0.000<br>3<br>(0.00<br>027.<br>0.000<br>33) | 0.000<br>2<br>(0.00<br>017.<br>0.000<br>24) | 0.000<br>5<br>(0.00<br>048.<br>0.000<br>53) | 0.000<br>5<br>(0.00<br>047.<br>0.000<br>53) | 0.000<br>5<br>(0.00<br>047.<br>0.000<br>54) | 0.000<br>8<br>(0.00<br>078.<br>0.000<br>83) | 0.000<br>8<br>(0.00<br>077.<br>0.000<br>83) | 0.000<br>8<br>(0.00<br>077.<br>0.000<br>84) |
| <b>INB (500k SEK per QALY)</b>        | -1281<br>(-1338.<br>-1240)                  | -925<br>(-980.<br>-879)                     | -568<br>(-636.<br>-513)                     | 351<br>(288.<br>408)                        | 1042<br>(975.<br>1111)                      | 1842<br>(1765<br>1922)                      | 1774<br>(1699<br>1853)                      | 2972<br>(2892<br>3068)                      | 4255<br>(4152<br>4378)                      |
| <b>Probability cost effectiveness</b> | 2.8%                                        | 11.0%                                       | 28.7%                                       | 66.8%                                       | 85.8%                                       | 93.4%                                       | 93.9%                                       | 98.6%                                       | 99.7%                                       |
| <b>Probability cost saving</b>        | 1.3%                                        | 7.1%                                        | 21.1%                                       | 57.5%                                       | 78.5%                                       | 91.4%                                       | 90.1%                                       | 97.5%                                       | 99.3%                                       |
| <b>Probability QALY increase</b>      | 72.9%                                       | 68.8%                                       | 61.8%                                       | 90.0%                                       | 84.1%                                       | 79.5%                                       | 98.4%                                       | 96.9%                                       | 92.1%                                       |

ERCP, endoscopic retrograde cholangiopancreatography; PTC, percutaneous-transhepatic-cholangiography; QALY, quality-adjusted life year

**Table s8** Key results for centers with endoscopists performing 100 ERCP per year and common resurgery strategy: PTC-send to expert.

| <b>Expert %</b>                       | <b>25%<br/>2</b>                            | <b>25%<br/>3</b>                            | <b>25%<br/>4</b>                                 | <b>50%<br/>2</b>                            | <b>50%<br/>3</b>                            | <b>50%<br/>4</b>                            | <b>75%<br/>2</b>                            | <b>75%<br/>3</b>                            | <b>75%<br/>4</b>                            |
|---------------------------------------|---------------------------------------------|---------------------------------------------|--------------------------------------------------|---------------------------------------------|---------------------------------------------|---------------------------------------------|---------------------------------------------|---------------------------------------------|---------------------------------------------|
| <b>Difficult y</b>                    | <b>(95%<br/>CI)</b>                         | <b>(95%<br/>CI)</b>                         | <b>(95%<br/>CI)</b>                              | <b>(95%<br/>CI)</b>                         | <b>(95%<br/>CI)</b>                         | <b>(95%<br/>CI)</b>                         | <b>(95%<br/>CI)</b>                         | <b>(95%<br/>CI)</b>                         | <b>(95%<br/>CI)</b>                         |
| <b>Incremental costs (SEK)</b>        | 2034<br>(1997.<br>2094)                     | 1697<br>(1653.<br>1756)                     | 1458<br>(1408<br>1517)                           | 734<br>(676.<br>795)                        | 136<br>(71.<br>204)                         | -526<br>(-610.<br>-449)                     | -419<br>(-494.<br>-340)                     | -1415<br>(-<br>1505.<br>1326)               | -2530<br>(-<br>2651.<br>2432)               |
| <b>Incremental QALYs</b>              | 0.000<br>2<br>(0.000<br>18.<br>0.000<br>22) | 0.000<br>2<br>(0.000<br>17.<br>0.000<br>22) | 0.000<br>1<br>(-<br>0.000<br>07.<br>0.000<br>14) | 0.000<br>4<br>(0.000<br>38.<br>0.000<br>42) | 0.000<br>4<br>(0.000<br>37.<br>0.000<br>43) | 0.000<br>3<br>(0.000<br>27.<br>0.000<br>34) | 0.000<br>5<br>(0.000<br>48.<br>0.000<br>53) | 0.000<br>6<br>(0.000<br>57.<br>0.000<br>63) | 0.000<br>5<br>(0.000<br>47.<br>0.000<br>54) |
| <b>INB (500k SEK per QALY)</b>        | -1953<br>(-<br>2016.<br>-<br>1912)          | -1602<br>(-<br>1660.<br>-<br>1557)          | -1383<br>(-<br>1447.<br>-<br>1328)               | -557<br>(-622.<br>-501)                     | 46<br>(-22.<br>113)                         | 683<br>(601.<br>771)                        | 688<br>(607.<br>763)                        | 1716<br>(1622.<br>1811)                     | 2788<br>(2689.<br>2914)                     |
| <b>Probability cost effectiveness</b> | 0.1%                                        | 1.1%                                        | 5.1%                                             | 27.7%                                       | 52.5%                                       | 71.2%                                       | 73.8%                                       | 88.9%                                       | 95.3%                                       |
| <b>Probability cost saving</b>        | 0.0%                                        | 0.7%                                        | 3.1%                                             | 20.9%                                       | 45.8%                                       | 66.2%                                       | 65.9%                                       | 85.6%                                       | 94.0%                                       |
| <b>Probability QALY increase</b>      | 65.9%                                       | 66.7%                                       | 58.8<br>%                                        | 85.3%                                       | 80.0%                                       | 68.6%                                       | 94.3%                                       | 91.2%                                       | 82.3%                                       |

ERCP, endoscopic retrograde cholangiopancreatography; PTC, percutaneous-transhepatic-cholangiography; QALY, quality-adjusted life year

**Table s9** Key results for centers with endoscopists performing 50 ERCP per year and common resurgery strategy: send to expert.

| <b>Expert %:</b>                      | <b>25%<br/>2</b>                            | <b>25%<br/>3</b>                            | <b>25%<br/>4</b>                            | <b>50%<br/>2</b>                            | <b>50%<br/>3</b>                            | <b>50%<br/>4</b>                            | <b>75%<br/>2</b>                            | <b>75%<br/>3</b>                            | <b>75%<br/>4</b>                            |
|---------------------------------------|---------------------------------------------|---------------------------------------------|---------------------------------------------|---------------------------------------------|---------------------------------------------|---------------------------------------------|---------------------------------------------|---------------------------------------------|---------------------------------------------|
| <b>Difficult y:</b>                   | <b>(95%<br/>CI)</b>                         |
| <b>Incremental costs (SEK)</b>        | 227<br>(190<br>277)                         | -678<br>(-721.<br>-625)                     | -1813<br>(-1867.<br>-1756)                  | -2423<br>(-2470.<br>-2639)                  | -4146<br>(-4206.<br>-4091)                  | -6453<br>(-6535.<br>-6384)                  | -4837<br>(-4906.<br>-4768)                  | -7433<br>(-7514.<br>-7361)                  | -<br>(-10961<br>-11073<br>-10866<br>)       |
| <b>Incremental QALYs</b>              | 0.000<br>3<br>(0.00<br>027.<br>0.000<br>33) | 0.000<br>4<br>(0.00<br>037.<br>0.000<br>44) | 0.000<br>5<br>(0.00<br>046.<br>0.000<br>55) | 0.000<br>6<br>(0.00<br>057.<br>0.000<br>63) | 0.000<br>7<br>(0.00<br>067.<br>0.000<br>74) | 0.001<br>0<br>(0.00<br>096.<br>0.001<br>05) | 0.000<br>8<br>(0.00<br>077.<br>0.000<br>83) | 0.001<br>1<br>(0.00<br>107.<br>0.001<br>14) | 0.001<br>5<br>(0.00<br>146.<br>0.001<br>55) |
| <b>INB (500k SEK per QALY)</b>        | -85<br>(-136.<br>-44)                       | 861<br>(807.<br>907)                        | 2070<br>(2008<br>2132)                      | 2699<br>(2646<br>2748)                      | 4514<br>(4454<br>4575)                      | 6963<br>(6890<br>7050)                      | 5248<br>(5177<br>5316)                      | 7996<br>(7920<br>8080)                      | 11721<br>(1162<br>0.<br>11831<br>)          |
| <b>Probability cost effectiveness</b> | 49.3<br>%                                   | 84.7<br>%                                   | 97.8<br>%                                   | 99.7<br>%                                   | 100%                                        | 100%                                        | 100%                                        | 100%                                        | 100%                                        |
| <b>Probability cost saving</b>        | 42.9<br>%                                   | 81.7<br>%                                   | 97.5<br>%                                   | 99.4<br>%                                   | 100%                                        | 100%                                        | 100%                                        | 100%                                        | 100%                                        |
| <b>Probability QALY increase</b>      | 72.8<br>%                                   | 72.0<br>%                                   | 74.3<br>%                                   | 91.3<br>%                                   | 89.6<br>%                                   | 91.1<br>%                                   | 97.4<br>%                                   | 98.4<br>%                                   | 97.8<br>%                                   |

ERCP, endoscopic retrograde cholangiopancreatography; QALY, quality-adjusted life year

**Table s10** Key results for centers with endoscopists performing 100 ERCP per year and common resurgery strategy: send to expert.

| <b>Expert %:</b>                      | <b>25%<br/>2</b>                            | <b>25%<br/>3</b>                            | <b>25%<br/>4</b>                            | <b>50%<br/>2</b>                            | <b>50%<br/>3</b>                            | <b>50%<br/>4</b>                            | <b>75%<br/>2</b>                            | <b>75%<br/>3</b>                            | <b>75%<br/>4</b>                            |
|---------------------------------------|---------------------------------------------|---------------------------------------------|---------------------------------------------|---------------------------------------------|---------------------------------------------|---------------------------------------------|---------------------------------------------|---------------------------------------------|---------------------------------------------|
| <b>Difficult y:</b>                   | <b>(95%<br/>CI)</b>                         |
| <b>Incremental costs (SEK)</b>        | 896<br>(859.<br>948)                        | 134<br>(90.<br>186)                         | -929<br>(-980.<br>-874)                     | -1480<br>(-1532.<br>-1428)                  | -3080<br>(-3136.<br>-3023)                  | -5206<br>(-5286.<br>-5139)                  | -3751<br>(-3818.<br>-3694)                  | -6145<br>(-6228.<br>-6074)                  | -9297<br>(-9413.<br>-9201)                  |
| <b>Incremental QALYs</b>              | 0.000<br>2<br>(0.00<br>018.<br>0.000<br>23) | 0.000<br>3<br>(0.00<br>027.<br>0.000<br>33) | 0.000<br>3<br>(0.00<br>026.<br>0.000<br>35) | 0.000<br>4<br>(0.00<br>038.<br>0.000<br>43) | 0.000<br>5<br>(0.00<br>047.<br>0.000<br>54) | 0.000<br>7<br>(0.00<br>066.<br>0.000<br>75) | 0.000<br>6<br>(0.00<br>058.<br>0.000<br>63) | 0.000<br>8<br>(0.00<br>077.<br>0.000<br>83) | 0.001<br>1<br>(0.00<br>106.<br>0.001<br>15) |
| <b>INB (500k SEK per QALY)</b>        | -803<br>(-861.<br>-762)                     | -2<br>(-58.<br>45)                          | 1101<br>(1040<br>1154)                      | 1678<br>(1627<br>1730)                      | 3352<br>(3291<br>3605)                      | 5570<br>(5497<br>5656)                      | 4045<br>(3986<br>4111)                      | 6558<br>(6486<br>6641)                      | 9848<br>(9749<br>9962)                      |
| <b>Probability cost effectiveness</b> | 14.5<br>%                                   | 52.4<br>%                                   | 88.7<br>%                                   | 98.0<br>%                                   | 99.8<br>%                                   | 100%<br>%                                   | 99.9<br>%                                   | 100%<br>%                                   | 100%<br>%                                   |
| <b>Probability cost saving</b>        | 9.7%<br>%                                   | 46.0<br>%                                   | 87.5<br>%                                   | 96.5<br>%                                   | 99.7<br>%                                   | 100%<br>%                                   | 99.9<br>%                                   | 100%<br>%                                   | 100%<br>%                                   |
| <b>Probability QALY increase</b>      | 66.0<br>%                                   | 67.4<br>%                                   | 65.3<br>%                                   | 83.2<br>%                                   | 83.1<br>%                                   | 84.2<br>%                                   | 93.9<br>%                                   | 94.4<br>%                                   | 94.2<br>%                                   |

ERCP, endoscopic retrograde cholangiopancreatography; QALY, quality-adjusted life year

**Table s11** Estimated cost saving for one endoscopist as a function of the learning effect introduced by TM. The maximal cost saving is determined using the area in between curves (**Fig. 2a** shows the case when the cannulation rate for the novice is 85%) and the cost saving when the tm equipment is used 3 years is calculated using (**Fig. 2b**) and equation (3) (with  $t=3$ ). Because the model carries the time horizon of 1 year only, one-tenth of the cost saving divided by the Number of ERCP/y is implemented in the model as a cost decrement.

| <b>Cannulation rate novice %</b> | <b>Maximal cost saving with TM (50 ERCP/y) (SEK)</b> | <b>Cost saving with TM used 3 years (50 ERCP/y) (SEK)</b> | <b>Maximal cost saving with TM (100 ERCP/y) (SEK)</b> | <b>Cost saving with TM used 3 years (100 ERCP/y) (SEK)</b> |
|----------------------------------|------------------------------------------------------|-----------------------------------------------------------|-------------------------------------------------------|------------------------------------------------------------|
| 85                               | 929049                                               | 780401                                                    | 1858098                                               | 1560802                                                    |
| 86                               | 855686                                               | 731585                                                    | 1711372                                               | 1463170                                                    |
| 87                               | 779078                                               | 678921                                                    | 1558155                                               | 1357843                                                    |
| 88                               | 706516                                               | 628533                                                    | 1413031                                               | 1257067                                                    |
| 89                               | 632214                                               | 575125                                                    | 1264428                                               | 1150251                                                    |
| 90                               | 553007                                               | 515260                                                    | 1106013                                               | 1030520                                                    |
| 91                               | 479199                                               | 457846                                                    | 958397                                                | 915693                                                     |
| 92                               | 403283                                               | 394924                                                    | 806565                                                | 789847                                                     |
| 93                               | 327201                                               | 326441                                                    | 654403                                                | 652883                                                     |
| 94                               | 250208                                               | 250208                                                    | 500416                                                | 500416                                                     |
| 95                               | 171220                                               | 171220                                                    | 342440                                                | 342440                                                     |
| 96                               | 88656                                                | 88656                                                     | 177313                                                | 177313                                                     |
| 97                               | 1818                                                 | 1818                                                      | 3636                                                  | 3636                                                       |

TM, teleguidance-assisted procedure; ERCP, endoscopic retrograde cholangiopancreatography
